# Supplementary material
Source: PubMed Central journal article supplement (PMC3256883)
Supplement: supp_M111.306472_Supplemental_datav3.pdf [file supp_M111.306472_Supplemental_datav3.pdf]

## Tideglusib inhibition on GSK-3 $\beta$

Supplemental Fig. 1: chemical structure of tideglusib

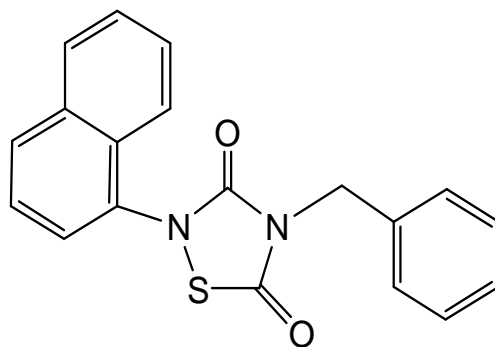

## Tideglusib inhibition on GSK-3 $\beta$

**Supplemental Table 1: kinases used to compare the inhibition caused by tideglusib and hypothemycin at 10  $\mu$ M.**

| Kinase        | Conserved Cys | % Inhib. caused by Tideglusib | % Inhib. caused by Hypothemycin | Assay type | Assay technology   | ATP conc.   |
|---------------|---------------|-------------------------------|---------------------------------|------------|--------------------|-------------|
| ABL1          | No            | 23.74                         | 60.37                           | Activity   | Z'-LYTE (TM)       | Km          |
| AKT1          | No            | 73.88                         | 6.42                            | Activity   | Z'-LYTE (TM)       | Km          |
| ALK4          | No            | 2.78                          | 88.67                           | Activity   | Z'-LYTE (TM)       | Km          |
| AMPK A1/B1/G1 | No            | 75.99                         | 40.39                           | Activity   | Z'-LYTE (TM)       | Km          |
| Aurora A      | No            | 87.64                         | 48.03                           | Activity   | Z'-LYTE (TM)       | Km          |
| BTK           | No            | 12.16                         | 31.78                           | Activity   | Z'-LYTE (TM)       | Km          |
| CDK1/cyclin B | No            | 2.72                          | 29.51                           | Activity   | Z'-LYTE (TM)       | Km          |
| CHEK1         | No            | 10.22                         | 0.00                            | Activity   | Z'-LYTE (TM)       | Km          |
| CK1 gamma 2   | No            | 9.63                          | 6.42                            | Activity   | Z'-LYTE (TM)       | Km          |
| CK2 alpha 1   | No            | 8.48                          | 8.23                            | Activity   | Z'-LYTE (TM)       | Km          |
| cMet          | No            | 53.35                         | 0.00                            | Activity   | Z'-LYTE (TM)       | Km          |
| DYRK3         | No            | 14.90                         | 5.80                            | Activity   | Z'-LYTE (TM)       | Km          |
| EGFR          | No            | 13.77                         | 10.57                           | Activity   | Z'-LYTE (TM)       | Km          |
| EPHA2         | No            | 0.00                          | 94.80                           | Activity   | Z'-LYTE (TM)       | Km          |
| ERBB2         | No            | 0.00                          | 0.00                            | Activity   | Z'-LYTE (TM)       | Km          |
| ERK1          | Yes           | 6.17                          | 93.22                           | Activity   | Z'-LYTE (TM)       | Km          |
| ERK2          | Yes           | 0.55                          | 87.00                           | Activity   | Z'-LYTE (TM)       | Km          |
| FGFR1         | No            | 0.00                          | 11.47                           | Activity   | Z'-LYTE (TM)       | Km          |
| FLT1          | Yes           | 4.80                          | 103.15                          | Activity   | Z'-LYTE (TM)       | Km          |
| FLT3          | Yes           | 88.66                         | 100.28                          | Activity   | Z'-LYTE (TM)       | Km          |
| FLT4          | Yes           | 7.88                          | 102.81                          | Activity   | Z'-LYTE (TM)       | Km          |
| GSK3 alpha    | Yes           | 29.50                         | 18.48                           | Activity   | Z'-LYTE (TM)       | Km          |
| GSK3 beta     | Yes           | 73.74                         | 49.73                           | Activity   | Z'-LYTE (TM)       | Km          |
| HGK           | No            | 62.69                         | 77.51                           | Activity   | Z'-LYTE (TM)       | Km          |
| IGF1R         | No            | 0.00                          | 0.00                            | Activity   | Z'-LYTE (TM)       | Km          |
| IKK beta      | No            | 97.32                         | 0.00                            | Activity   | Z'-LYTE (TM)       | Km          |
| INSR          | No            | 0.59                          | 0.00                            | Activity   | Z'-LYTE (TM)       | Km          |
| IRAK4         | No            | 0.00                          | 81.89                           | Activity   | Z'-LYTE (TM)       | Km          |
| JAK3          | No            | 86.67                         | 48.57                           | Activity   | Z'-LYTE (TM)       | Km          |
| JNK1          | No            | 12.82                         | 10.26                           | Activity   | Z'-LYTE (TM)       | 100 $\mu$ M |
| KDR           | Yes           | 99.77                         | 102.64                          | Activity   | Z'-LYTE (TM)       | Km          |
| KIT           | Yes           | 0.00                          | 57.27                           | Activity   | Z'-LYTE (TM)       | Km          |
| LCK           | No            | 1.33                          | 82.33                           | Activity   | Z'-LYTE (TM)       | Km          |
| MAPKAPK2      | No            | 96.90                         | 0.00                            | Activity   | Z'-LYTE (TM)       | Km          |
| MARK2         | No            | 6.40                          | 18.73                           | Activity   | Z'-LYTE (TM)       | Km          |
| MEK1          | Yes           | 14.43                         | 89.78                           | Activity   | Z'-LYTE (TM)       | 100 $\mu$ M |
| MEK2          | Yes           | 25.67                         | 91.33                           | Activity   | Z'-LYTE (TM)       | 100 $\mu$ M |
| MEK3          | Yes           | 11.23                         | 87.52                           | Binding    | Lantha-Screen (TM) | -           |

## Tideglusib inhibition on GSK-3 $\beta$

| Kinase      | Conserved Cys | % Inhib. caused by Tideglusib | % Inhib. caused by Hypothemycin | Assay type | Assay technology   | ATP conc.   |
|-------------|---------------|-------------------------------|---------------------------------|------------|--------------------|-------------|
| MNK1        | Yes           | 0.00                          | 94.25                           | Activity   | Z'-LYTE (TM)       | Km          |
| MNK2        | Yes           | 57.03                         | 100.66                          | Binding    | Lantha-Screen (TM) | -           |
| mTOR        | No            | 25.49                         | 4.24                            | Activity   | Z'-LYTE (TM)       | Km          |
| NEK1        | No            | 11.95                         | 0.00                            | Activity   | Z'-LYTE (TM)       | Km          |
| NIK         | Yes           | 49.71                         | 102.27                          | Binding    | Lantha-Screen (TM) | -           |
| NLK         | Yes           | 36.14                         | 102.59                          | Binding    | Lantha-Screen (TM) | -           |
| p38 alpha   | No            | 33.21                         | 0.00                            | Activity   | Z'-LYTE (TM)       | 100 $\mu$ M |
| p70S6K      | No            | 34.01                         | 0.00                            | Activity   | Z'-LYTE (TM)       | Km          |
| PAK4        | No            | 38.75                         | 7.91                            | Activity   | Z'-LYTE (TM)       | Km          |
| PDGFR alpha | Yes           | 0.00                          | 100.51                          | Activity   | Z'-LYTE (TM)       | Km          |
| PDGFR beta  | Yes           | 0.47                          | 100.23                          | Activity   | Z'-LYTE (TM)       | Km          |
| PHKG2       | No            | 64.56                         | 16.33                           | Activity   | Z'-LYTE (TM)       | Km          |
| PIM1        | No            | 31.83                         | 12.19                           | Activity   | Z'-LYTE (TM)       | Km          |
| PKA         | No            | 17.53                         | 3.30                            | Activity   | Z'-LYTE (TM)       | Km          |
| PKC beta I  | No            | 29.89                         | 6.09                            | Activity   | Z'-LYTE (TM)       | Km          |
| PKD2        | Yes           | 87.87                         | 99.34                           | Activity   | Z'-LYTE (TM)       | Km          |
| PLK1        | No            | 3.02                          | 4.25                            | Activity   | Z'-LYTE (TM)       | Km          |
| PRAK        | Yes           | 69.85                         | 89.98                           | Activity   | Z'-LYTE (TM)       | Km          |
| RET         | No            | 24.18                         | 73.61                           | Activity   | Z'-LYTE (TM)       | Km          |
| ROCK1       | No            | 52.76                         | 0.00                            | Activity   | Z'-LYTE (TM)       | Km          |
| RSK1        | Yes           | 15.46                         | 19.50                           | Activity   | Z'-LYTE (TM)       | Km          |
| RSK2        | Yes           | 31.32                         | 16.46                           | Activity   | Z'-LYTE (TM)       | Km          |
| RSK3        | Yes           | 0.00                          | 14.85                           | Activity   | Z'-LYTE (TM)       | Km          |
| RSK4        | Yes           | 86.51                         | 30.82                           | Activity   | Z'-LYTE (TM)       | Km          |
| SRC         | No            | 0.00                          | 72.30                           | Activity   | Z'-LYTE (TM)       | Km          |
| SYK         | No            | 75.47                         | 97.06                           | Activity   | Z'-LYTE (TM)       | Km          |
| TAK1-TAB1   | Yes           | 93.49                         | 96.20                           | Binding    | Lantha-Screen (TM) | -           |
| Tie2        | No            | 0.00                          | 21.74                           | Activity   | Z'-LYTE (TM)       | Km          |
| TRKA        | No            | 39.12                         | 91.75                           | Activity   | Z'-LYTE (TM)       | Km          |
| ZAK         | Yes           | 81.38                         | 101.17                          | Binding    | Lantha-Screen (TM) | -           |
